# Supplementary material for: Preparation of an ultra-low profile and high peel strength copper foil with rice-grain microstructures
Source: Royal Society of Chemistry journal article supplement (doi:10.1039/d3ma00565h), 2023-01-01
Supplement: d3ma00565h1.pdf [file d3ma00565h1.pdf]

## Electronic Supplementary Information

### Preparation of ultra-low profile and high peel strength copper foil with rice-grain microstructure

Li-juan Wang, Xiao-wei Fa, Yun-zhi Tang\*, Juan Liao, Yu-hui Tan\*, Ning Song,

Jian Huang, Zhen Sun, Men Zhao, Wei-fei Liu, Man Zhao

**Table.S1** Electrolyte composition for different procedures

| Composition                                                             | Electroplating solution | Micro-coarsening solution | Curing solution | heat resistant alloy treatment | Silane coupling solution |
|-------------------------------------------------------------------------|-------------------------|---------------------------|-----------------|--------------------------------|--------------------------|
| CuSO <sub>4</sub> ·5H <sub>2</sub> O(g/L)                               | 70                      | 10                        | 40              |                                | —                        |
| H <sub>2</sub> SO <sub>4</sub> (g/L)                                    | 120                     | 100                       | 100             |                                | —                        |
| HCl(ppm/L)                                                              | 15                      | —                         | —               |                                | —                        |
| Additive 1(mg/L)                                                        | 10                      | —                         | —               |                                | —                        |
| Additive 2(mg/L)                                                        | 20                      | —                         | —               |                                | —                        |
| Na <sub>2</sub> WO <sub>4</sub> ·2H <sub>2</sub> O(g/L)                 | —                       | 0.05                      | —               | 40                             | —                        |
| Tb <sub>2</sub> (SO <sub>4</sub> ) <sub>3</sub> ·8H <sub>2</sub> O(g/L) | —                       | 0.1                       | —               |                                | —                        |
| KH 590(mL/L)                                                            | —                       | —                         | —               |                                | 2                        |
| NiSO <sub>4</sub> ·7H <sub>2</sub> O(g/L)                               |                         |                           |                 | 20                             |                          |
| C <sub>6</sub> H <sub>5</sub> Na <sub>3</sub> O <sub>7</sub> (g/L)      |                         |                           |                 | 40                             |                          |
| (NH <sub>4</sub> SO <sub>4</sub> ) <sub>2</sub> SO <sub>4</sub> (g/L)   |                         |                           |                 | 15                             |                          |

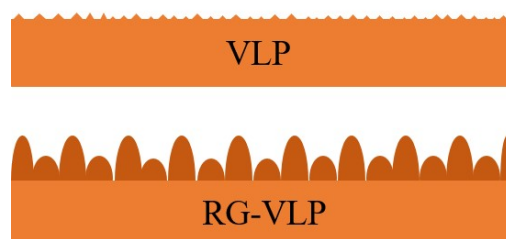

**Fig. S1.** Schematic diagram of two different copper tumor after coarsening treatment for VLP and RG-VLP

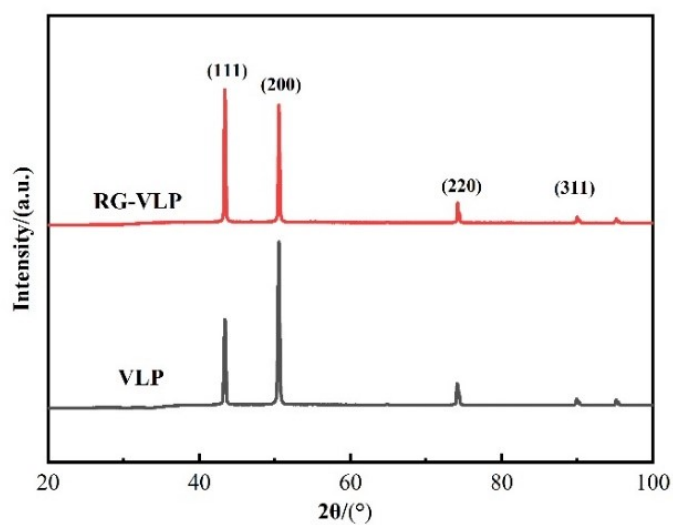

**Fig. S2.** XRD of copper foil before and after micro-coarsening

**Table.S2** Crystal orientation  $T_C$  (%) and grain size  $D^*$  of copper foil before and after micro-coarsening.

| Samples       | $T_{c(111)}$ | $T_{c(200)}$ | $T_{c(220)}$ | $T_{c(311)}$ | $D^*/nm$ |
|---------------|--------------|--------------|--------------|--------------|----------|
| <b>VLP</b>    | 14.17        | 59.22        | 20.84        | 5.77         | —        |
| <b>RG-VLP</b> | 26.40        | 51.77        | 15.31        | 6.52         | 30.51    |

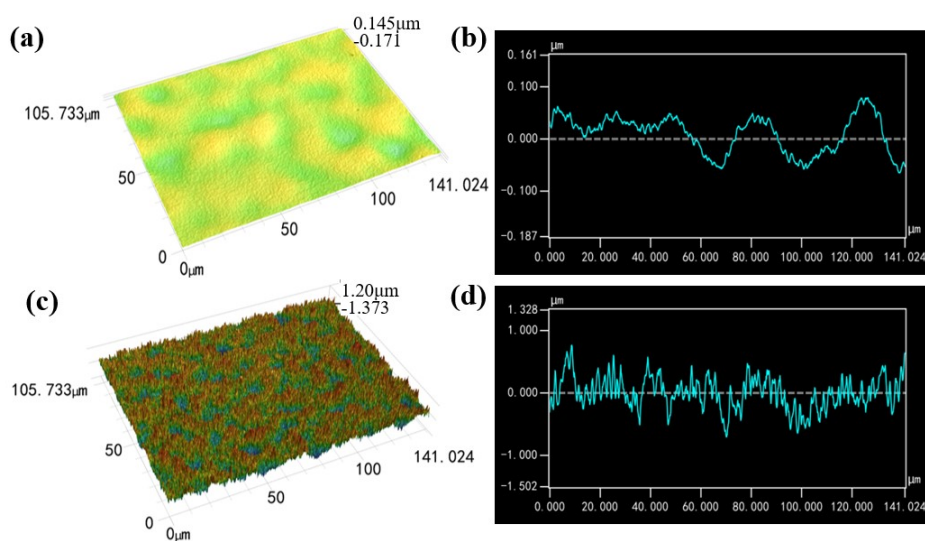

**Fig. S3.** 3D morphology of copper foil surface and cross-sectional change for (a) (b)VLP and (c) (d) RG-VLP respectively

**Table S2** CLSM values for copper foils.

| Sample        | Rz ( $\mu\text{m}$ ) | Ra ( $\mu\text{m}$ ) | Surface area ( $\mu\text{m}^2$ ) | Surface area ratio |
|---------------|----------------------|----------------------|----------------------------------|--------------------|
| <b>VLP</b>    | 0.995                | 0.117                | 18512.53                         | 1.09               |
| <b>RG-VLP</b> | 1.887                | 0.264                | 24010.62                         | 1.44               |

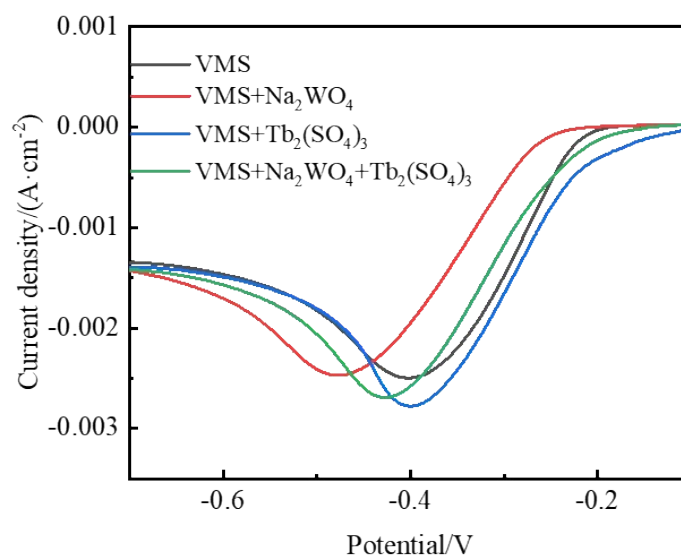

**Fig. S4.** Polarization curves of additives in roughening solution

The additive  $\text{Na}_2\text{WO}_4$  shifted the polarization curve negatively when added to the blank solution, acting as an inhibitor of copper ion deposition. The additive  $\text{Tb}_2(\text{SO}_4)_3$  shifted the polarization curve positively when added to the blank solution, acting to promote the deposition of copper ions. The synergistic effect of the two additives plays a polarizing effect, inhibiting the deposition of copper ions, which is conducive to controlling the morphology and size of copper tumors.

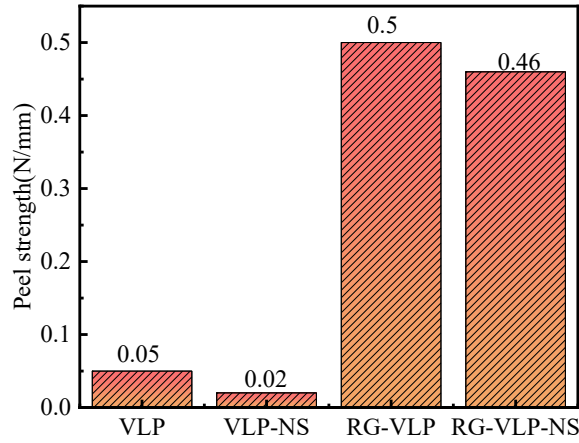

**Fig. S5.** Peel strength of copper foil (Note: VLP-NS, RG-VLP-NS indicate without silane treatment)

The peel strength of VLP-NS was reduced by 0.03 N/mm compared to VLP, and the peel strength of RG-VLP-NS was reduced by 0.04 N/mm compared to RG-VLP.

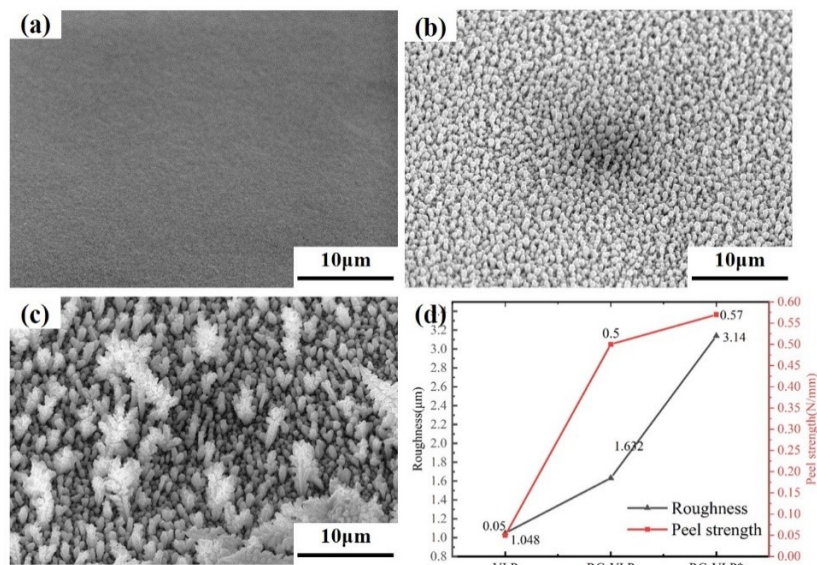

**Fig. S6.** The SEM and performance test plots of copper foils, (a) VLP, (b) RG-VLP, (c) RG-VLP\*, (d) surface roughness and peel strength of copper foils.

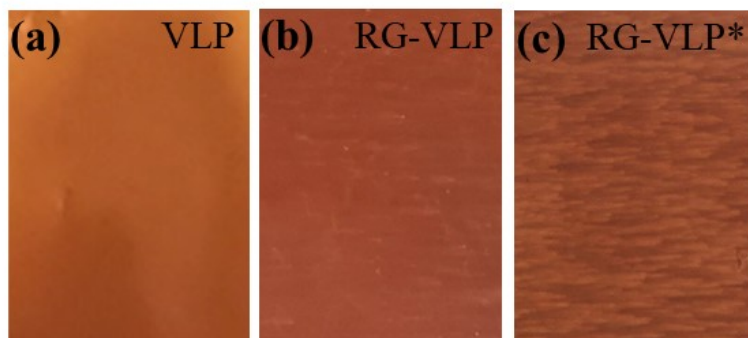

**Fig. S7.** The physical photographs of copper foil, (a) VLP, (b) RG-VLP, (c) RG-VLP\*

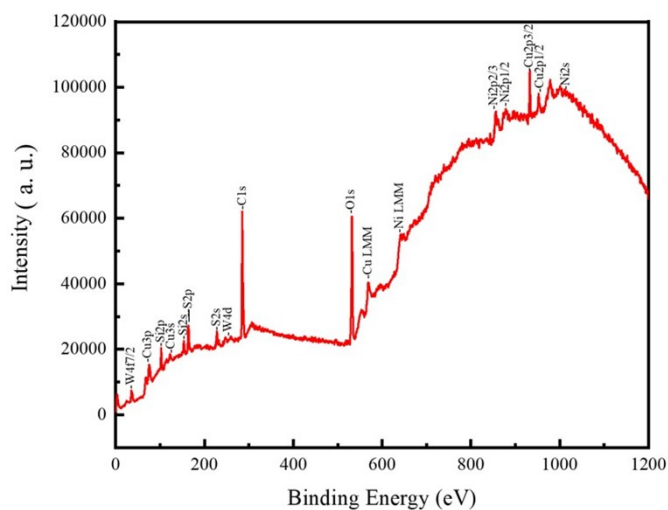

**Fig. S8.** XPS analysis spectrum of copper foil surface

Fig. S8 shows the XPS analysis spectrum of the VLP surface, and the peaks of Si<sub>2p</sub> and Si<sub>2s</sub> were detected at 102.40 eV and 153.46 eV, respectively. In addition, the presence of silane coupling agent on the surface of the copper foil was also verified by the detection of the peak of S<sub>2p</sub> in sulfhydryl group at 163.76 eV. The W<sub>4f</sub> has a peak value at 34.88eV between 34.75 and 35.58eV, which proves that the copper foil surface contains W element. The binding energies of Ni<sub>2p</sub> are in the range of 853.28-853.3 eV and 855.08-855.3 eV, and the peak at 855.76 eV in the figure indicates the presence of Ni element on the surface of the copper foil.
